# Supplementary material
Source: publisher figshare collection journal article supplement (https://tandf.figshare.com/articles/dataset/_/3850332)
Supplement: Supplementary file 1 [file 2]

# **Adaptive Cruise Control - Afstuderen Mark Gorter**

## **Inhoudsopgave**

|                           |    |
|---------------------------|----|
| Beginpagina .....         | 2  |
| 1. Inleiding .....        | 3  |
| 2. Gebruik ACC .....      | 6  |
| 3. Ervaring met ACC ..... | 12 |
| 4. Rijstijl .....         | 19 |
| Afsluitende pagina .....  | 22 |
| Variabelen .....          | 23 |

## Beginpagina

Deze enquête gaat over het gebruik van Adaptive Cruise Control. ACC is een optioneel pakket op verschillende modellen auto's. Het is een systeem dat met behulp van radar detecteert waar de voorganger van de auto zich bevindt. Op basis daarvan past hij de snelheid van de auto aan.

Deze vragenlijst is opgesteld in het kader van mijn afstudeeronderzoek. In dit onderzoek bestudeer ik de invloed van Adaptive Cruise Control op het gedrag van de bestuurder, en op de veiligheid en de doorstroming op de weg. Zo kunnen de uitkomsten van dit onderzoek meehelpen om ACC in de toekomst te verbeteren en het nog comfortabeler en veiliger te maken. En misschien kan ACC wel een rol spelen in het oplossen van files in Nederland!

Om betrouwbaar onderzoek te doen, heb ik úw hulp nodig. Hebt u ervaring met het gebruik van ACC, dan stel ik uw mening zeer op prijs! Het invullen van deze enquête kost ongeveer 10 minuten en het is volledig anoniem.

Als u de vragenlijst volledig invult, kunt u kans maken op één van de vier VVV-bonnen van €25. Wilt u meedoen, laat dan aan het einde van de enquête uw e-mailadres achter.

Bent u geïnteresseerd in de uitkomsten van mijn onderzoek? Houd dan rond juli 2015 [de autopagina van de ANWB](#) in de gaten. Daar zal een artikel met de onderzoeksresultaten gepubliceerd worden.

Alvast vriendelijk bedankt voor het invullen!

Mark Gorter  
Afstudeerder bij Royal HaskoningDHV



1. Inleiding

Bent u een man of een vrouw?

- ☐ Man
- ☐ Vrouw

Wat is uw leeftijd?

- ☐ Jonger dan 18 jaar oud
- ☐ 18 - 19 jaar oud
- ☐ 20 - 29 jaar oud
- ☐ 30 - 39 jaar oud
- ☐ 40 - 49 jaar oud
- ☐ 50 - 59 jaar oud
- ☐ 60 jaar of ouder

Bent u in het bezit van een auto-rijbewijs (B of BE)?

- ☐ Ja
- ☐ Nee

---

Als Leeftijd bevat '00-18'

OF Rijbewijs bevat 'Nee'  **Beëindig vragenlijst**

---

Hoeveel jaar bent u in het bezit van een rijbewijs?

- ☐ 0 - 1 jaar
- ☐ 2 - 4 jaar
- ☐ 5 - 9 jaar
- ☐ 10 - 19 jaar
- ☐ 20 jaar of meer

Hoeveel kilometer per jaar rijdt u in totaal (zakelijk én privé)?

Om de inschatting gemakkelijker te maken, staat het aantal kilometers per week ook vermeld.

- ☐ Minder dan 10.000 km/jaar (190 km/week)
- ☐ Tussen de 10.000 en 20.000 km/jaar (190 - 385 km/week)
- ☐ Tussen de 20.000 en 30.000 km/jaar (385 - 575 km/week)
- ☐ Tussen de 30.000 en 40.000 km/jaar (575 - 770 km/week)
- ☐ Meer dan 40.000 km/jaar (770 km/week)

---

 [-Hebt u ervaring met Adaptive Cruise Control? Ervaring betekent dat u een auto met ACC bezit of regelmatig \(wekelijks of vaker\) gebruikt.](#)

---



## 2. Gebruik ACC

Hebt u ervaring met Adaptive Cruise Control?

Ervaring betekent dat u een auto met ACC bezit of regelmatig (wekelijks of vaker) gebruikt.

☐ Ja

☐ Nee  [Ga verder met vraag \*Rijstijl\*](#)

Hebt u ervaring met meerdere soorten auto's met ACC, vul dan deze enquête in betreffende de auto waarmee u het meeste ervaring heeft.

Van welk automerk is deze auto met ACC?

- ☐ Audi
- ☐ BMW
- ☐ Citroën
- ☐ Ford
- ☐ Mazda
- ☐ Mercedes Benz
- ☐ Mitsubishi
- ☐ Opel
- ☐ Peugeot
- ☐ Seat
- ☐ Škoda
- ☐ Suzuki
- ☐ Volkswagen
- ☐ Volvo
- ☐ Anders, namelijk:

---

Heeft deze auto met ACC een automatische of een handgeschakelde versnellingsbak?

- ☐ Automatische versnellingsbak
- ☐ Handgeschakelde versnellingsbak

Heeft dit ACC-systeem een ondergrens of blijft het actief bij lage snelheden?

- ☐ Het deactiveert onder een bepaalde snelheid (meestal rond de 50 km/u)
- ☐ Het blijft actief totdat de auto stilstaat
- ☐ Dat weet ik niet

Heeft dit ACC-systeem een instelbare volgafstand?

- ☐ Ja, er zijn verschillende standen instelbaar
- ☐ Nee, er is maar één stand mogelijk
- ☐ Dat weet ik niet



Van wie is de auto met ACC die u gebruikt?

- ☐ Het is mijn eigen auto
- ☐ Het is een (lease)auto van het bedrijf
- ☐ Het is een huurauto/deelauto
- ☐ Het is een auto van een familielid of kennis
- ☐ Anders, namelijk:

---

Hoe gebruikt u deze auto met ACC?

- ☐ (Bijna) alleen privé
- ☐ (Bijna) alleen zakelijk
- ☐ Privé en zakelijk

Hoe lang hebt u rij-ervaring in deze auto met ACC?

- ☐ Minder dan 3 maanden
- ☐ Tussen de 3 en de 6 maanden
- ☐ Tussen de 6 maanden en 1 jaar
- ☐ Tussen de 1 en 2 jaar
- ☐ Meer dan 2 jaar

Hoeveel kilometer per week rijdt u gemiddeld in deze auto met ACC?

- ☐ Minder dan 200 km/week
- ☐ Tussen de 200 en 400 km/week
- ☐ Tussen de 400 en 600 km/week
- ☐ Tussen de 600 en 800 km/week
- ☐ Meer dan 800 km/week

Wanneer hebt u voor het laatst gebruik gemaakt van deze auto met ACC?

- ☐ Minder dan een half jaar geleden
- ☐ Meer dan een half jaar geleden

Heeft u bewust voor ACC gekozen?

- ☐ Ja, ik heb bewust gekozen voor ACC
- ☐ Ja, ik heb bewust gekozen voor een pakket waar ACC in zit
- ☐ Nee, ik heb niet bewust gekozen voor ACC
- ☐ Nee, een ander heeft gekozen voor ACC
- ☐ Anders, namelijk:

---

Bent u voor het gebruik van deze auto met ACC voorgelicht over de werking ervan, bijvoorbeeld door een uitleg van de autodealer, of door het instructieboekje te lezen?

- ☐ Ja, ik ben uitgebreid voorgelicht over ACC
- ☐ Ja, ik ben een klein beetje voorgelicht over ACC
- ☐ Nee, ik ben niet voorgelicht over ACC
- ☐ Dat weet ik niet meer

Bent u zich bewust van de beperkingen en risico's van Adaptive Cruise Control?

- ☐ Ja, ik ben me volledig bewust van de beperkingen en risico's
- ☐ Ja, ik weet ongeveer waar ik op moet letten
- ☐ Nee, daar houd ik me niet of nauwelijks mee bezig
- ☐ Anders, namelijk:

---

---

➡ -Geef voor elk weegtype aan of u ACC prettig vindt om te gebruiken.

---



## 3. Ervaring met ACC

Geef voor elk wegtype aan of u ACC prettig vindt om te gebruiken.

|                                             | Ze<br>er<br>onpre<br>ttig | Onpre<br>ttig         | Neutraal              | Prettig               | Ze<br>er<br>pre<br>ttig |
|---------------------------------------------|---------------------------|-----------------------|-----------------------|-----------------------|-------------------------|
| Op wegen binnen de bebouwde kom             | <input type="radio"/>     | <input type="radio"/> | <input type="radio"/> | <input type="radio"/> | <input type="radio"/>   |
| Op provinciale wegen buiten de bebouwde kom | <input type="radio"/>     | <input type="radio"/> | <input type="radio"/> | <input type="radio"/> | <input type="radio"/>   |
| Op autowegen                                | <input type="radio"/>     | <input type="radio"/> | <input type="radio"/> | <input type="radio"/> | <input type="radio"/>   |
| Op autosnelwegen                            | <input type="radio"/>     | <input type="radio"/> | <input type="radio"/> | <input type="radio"/> | <input type="radio"/>   |

Ruimte voor een eventuele toelichting:

Deze vraag heeft betrekking **op de snelweg**. Geef voor elke mate van verkeersdrukte aan of u ACC fijn vindt om te gebruiken.

|                                                                         | Ze<br>er<br>onpre<br>ttig | Onpre<br>ttig         | Neutraal              | Prettig               | Ze<br>er<br>pre<br>ttig |
|-------------------------------------------------------------------------|---------------------------|-----------------------|-----------------------|-----------------------|-------------------------|
| Weinig tot geen verkeer - geen interactie met andere voertuigen.        | <input type="radio"/>     | <input type="radio"/> | <input type="radio"/> | <input type="radio"/> | <input type="radio"/>   |
| Gemiddelde verkeersdrukte - af en toe interactie met andere voertuigen. | <input type="radio"/>     | <input type="radio"/> | <input type="radio"/> | <input type="radio"/> | <input type="radio"/>   |
| Veel verkeer - (bijna) continu interactie met andere voertuigen.        | <input type="radio"/>     | <input type="radio"/> | <input type="radio"/> | <input type="radio"/> | <input type="radio"/>   |
| Grote verkeersdrukte - langzaamrijdend verkeer of file.                 | <input type="radio"/>     | <input type="radio"/> | <input type="radio"/> | <input type="radio"/> | <input type="radio"/>   |

Ruimte voor een eventuele toelichting:

De volgende stellingen gaan over uw rijtaak wanneer u ACC aan heeft, vergeleken met wanneer u ACC niet aan heeft.  
Kunt u bij elke stelling aangeven in hoeverre u het er mee eens bent?

|                                                                                                         | Ze<br>er<br>mee<br>oneens | Mee<br>oneens         | Enigszins<br>mee oneens | Neutraal              | Enigszins<br>mee eens | Mee eens              | Ze<br>er<br>mee<br>eens |
|---------------------------------------------------------------------------------------------------------|---------------------------|-----------------------|-------------------------|-----------------------|-----------------------|-----------------------|-------------------------|
| Als ik ACC aan heb, kost het autorijden me minder inspanning                                            | <input type="radio"/>     | <input type="radio"/> | <input type="radio"/>   | <input type="radio"/> | <input type="radio"/> | <input type="radio"/> | <input type="radio"/>   |
| Als ik ACC aan heb, hoef ik minder op het verkeer te letten                                             | <input type="radio"/>     | <input type="radio"/> | <input type="radio"/>   | <input type="radio"/> | <input type="radio"/> | <input type="radio"/> | <input type="radio"/>   |
| Als ik ACC aan heb, doe ik meer activiteiten tijdens het autorijden (bellen, smartphone gebruiken, ...) | <input type="radio"/>     | <input type="radio"/> | <input type="radio"/>   | <input type="radio"/> | <input type="radio"/> | <input type="radio"/> | <input type="radio"/>   |

Ruimte voor een eventuele toelichting:

De volgende stellingen gaan over de veiligheid wanneer u ACC aan heeft, vergeleken met wanneer u ACC niet aan heeft. Kunt u bij elke stelling aangeven in hoeverre u het er mee eens bent?

|                                                                                                              | Ze<br>er<br>mee<br>oneens | Mee<br>oneens         | Enigszins<br>mee oneens | Neutraal              | Enigszins<br>mee eens | Mee<br>eens           | Ze<br>er<br>mee<br>eens |
|--------------------------------------------------------------------------------------------------------------|---------------------------|-----------------------|-------------------------|-----------------------|-----------------------|-----------------------|-------------------------|
| Als ik ACC aan heb, loop ik minder risico op een kop-staart-botsing                                          | <input type="radio"/>     | <input type="radio"/> | <input type="radio"/>   | <input type="radio"/> | <input type="radio"/> | <input type="radio"/> | <input type="radio"/>   |
| Als ik ACC aan heb, kom ik minder vaak in onveilige situaties terecht                                        | <input type="radio"/>     | <input type="radio"/> | <input type="radio"/>   | <input type="radio"/> | <input type="radio"/> | <input type="radio"/> | <input type="radio"/>   |
| Als ik ACC aan heb, rijd ik minder vaak sneller dan de maximumsnelheid                                       | <input type="radio"/>     | <input type="radio"/> | <input type="radio"/>   | <input type="radio"/> | <input type="radio"/> | <input type="radio"/> | <input type="radio"/>   |
| Als ik ACC aan heb, heb ik meer tijd nodig om in te grijpen door te remmen of bij te sturen als dat nodig is | <input type="radio"/>     | <input type="radio"/> | <input type="radio"/>   | <input type="radio"/> | <input type="radio"/> | <input type="radio"/> | <input type="radio"/>   |
| Ik zou liever hebben dat ACC alleen een melding en/of geluidssignaal gaf, in plaats van actief in te grijpen | <input type="radio"/>     | <input type="radio"/> | <input type="radio"/>   | <input type="radio"/> | <input type="radio"/> | <input type="radio"/> | <input type="radio"/>   |

Ruimte voor een eventuele toelichting:

Geef aan hoe vaak de volgende situaties voorkomen als u ACC aan heeft staan.

|                                                                                                             | Helemaal<br>nooit     | Bijna<br>nooit        | Af en<br>toe          | Regelmatig            | Vaak                  | Bijna<br>altijd       | Altijd                |
|-------------------------------------------------------------------------------------------------------------|-----------------------|-----------------------|-----------------------|-----------------------|-----------------------|-----------------------|-----------------------|
| U geeft gas bij om de afstand tot uw voorganger kleiner te maken omdat de ACC een te grote afstand aanhoudt | <input type="radio"/> |
| Een auto voegt in tussen u en uw voorganger, en uw auto reageert door fors te remmen                        | <input type="radio"/> |
| U geeft gas bij om een andere auto in te halen, omdat uw auto anders afremt voor die auto                   | <input type="radio"/> |
| In een scherpe bocht verliest de ACC van uw auto zicht op uw voorganger, en dus versnelt uw auto onverwacht | <input type="radio"/> |
| ACC schakelt plotseling uit terwijl u het niet verwacht                                                     | <input type="radio"/> |
| ACC remt of versnelt plotseling terwijl u dat niet verwacht                                                 | <input type="radio"/> |

Zijn er andere situaties die u meemaakt of meegemaakt heeft tijdens het gebruik van ACC die u als onveilig of onprettig ervaart? Vermeld bij de situatie ook hoe vaak het voorkomt.

De volgende stellingen gaan over de doorstroming wanneer u ACC aan heeft, vergeleken met wanneer u ACC niet aan heeft. Kunt u bij elke stelling aangeven in hoeverre u het er mee eens bent?

|                                                                                                | Ze<br>er<br>mee<br>oneens | Mee<br>oneens         | Enigszins<br>mee eens | Neutraal              | Enigszins<br>mee oneens | Mee eens              | Ze<br>er<br>mee<br>eens |
|------------------------------------------------------------------------------------------------|---------------------------|-----------------------|-----------------------|-----------------------|-------------------------|-----------------------|-------------------------|
| Als ik ACC aan heb, rijd ik gelijkmatiger (dus ik hoef minder vaak te remmen en op te trekken) | <input type="radio"/>     | <input type="radio"/> | <input type="radio"/> | <input type="radio"/> | <input type="radio"/>   | <input type="radio"/> | <input type="radio"/>   |
| Als ik ACC aan heb, houd ik meer afstand tot mijn voorganger                                   | <input type="radio"/>     | <input type="radio"/> | <input type="radio"/> | <input type="radio"/> | <input type="radio"/>   | <input type="radio"/> | <input type="radio"/>   |
| Als ik ACC aan heb, wissel ik minder vaak van rijstrook op de snelweg                          | <input type="radio"/>     | <input type="radio"/> | <input type="radio"/> | <input type="radio"/> | <input type="radio"/>   | <input type="radio"/> | <input type="radio"/>   |
| Als ik ACC aan heb, rijd ik meer op de rechterrijstrook op de snelweg                          | <input type="radio"/>     | <input type="radio"/> | <input type="radio"/> | <input type="radio"/> | <input type="radio"/>   | <input type="radio"/> | <input type="radio"/>   |

Ruimte voor een eventuele toelichting:



Kunt u met behulp van de schuifbalk een rapportcijfer geven aan het ACC-systeem waar u ervaring mee heeft?  
(1 is buitengewoon negatief - 10 is buitengewoon positief)

Kunt u toelichten waarom u dit cijfer gegeven heeft?

Geef aan of u het eens bent met de volgende stelling:  
Ik zou Adaptive Cruise Control aanbevelen aan een ander.

- ☐ Zeer mee eens
- ☐ Mee eens
- ☐ Neutraal
- ☐ mee oneens
- ☐ Zeer mee oneens
- ☐ Dat weet ik niet

Hebt verder nog andere ervaringen, opmerkingen of tips over de vormgeving en het gebruik van Adaptive Cruise Control?





## 4. Rijstijl

Tot slot enkele vragen om erachter te komen wat uw rijstijl is.  
Deze vragen staan dus los van de vragen over Adaptive Cruise Control.

Hoe typeert u uw eigen rijstijl? Geef voor elke twee trefwoorden aan in hoeverre ze op uw rijstijl van toepassing zijn.

|              |                       |                       |                       |                       |                       |                       |                       |            |
|--------------|-----------------------|-----------------------|-----------------------|-----------------------|-----------------------|-----------------------|-----------------------|------------|
| Langzaam     | <input type="radio"/> | Snel       |
| Zorgvuldig   | <input type="radio"/> | Zorgeloos  |
| Tolerant     | <input type="radio"/> | Intolerant |
| Besluiteloos | <input type="radio"/> | Beslist    |

Geef aan hoe vaak u de volgende handelingen in het verkeer uitvoert.

|                                                                                                         | Helemaal<br>nooit     | Bijna<br>nooit        | Af en<br>toe          | Regelmatig            | Vaak                  | Bijna<br>altijd       | Altijd                |
|---------------------------------------------------------------------------------------------------------|-----------------------|-----------------------|-----------------------|-----------------------|-----------------------|-----------------------|-----------------------|
| Op de snelweg zo dicht op uw voorganger rijden dat het moeilijk is om in een noodgeval veilig te remmen | <input type="radio"/> |
| Op de snelweg harder rijden dan de maximum-snelheid                                                     | <input type="radio"/> |
| Een boete voor een verkeersovertreding ontvangen                                                        | <input type="radio"/> |
| Uzelf ergeren aan medeweggebruikers                                                                     | <input type="radio"/> |
| Andere activiteiten uitvoeren achter het stuur, zoals bellen, uw smartphone bedienen of roken           | <input type="radio"/> |

Wilt u kans maken op één van de vier VVV-bonnen, vult u dan hier uw e-mailadres in. Er wordt vóór 1 juli 2015 met u contact opgenomen als u gewonnen heeft.

---

---

 **Beëindig vragenlijst**

---

## Afsluitende pagina

U bent aan het einde van de enquête. Bent u geïnteresseerd in de uitkomsten van mijn onderzoek? Houd dan rond juli 2015 [de autopagina van de ANWB](#) in de gaten. Daar zal een artikel met de onderzoeksresultaten gepubliceerd worden.

Vriendelijk bedankt voor het invullen!  
U kunt dit scherm sluiten.

## Variabelen

| Variabele       | Beschrijving                                                                                                                                                  | Waarden                                                                                                                                                                                                                                                                                                |
|-----------------|---------------------------------------------------------------------------------------------------------------------------------------------------------------|--------------------------------------------------------------------------------------------------------------------------------------------------------------------------------------------------------------------------------------------------------------------------------------------------------|
| Geslacht        | Bent u een man of een vrouw?                                                                                                                                  | {Man,Man}<br>{Vrouw,Vrouw}                                                                                                                                                                                                                                                                             |
| Leeftijd        | Wat is uw leeftijd?                                                                                                                                           | {00-18,Jonger dan 18 jaar oud}<br>{18-19,18 - 19 jaar oud}<br>{20-29,20 - 29 jaar oud}<br>{30-39,30 - 39 jaar oud}<br>{40-49,40 - 49 jaar oud}<br>{50-59,50 - 59 jaar oud}<br>{60-99,60 jaar of ouder}                                                                                                 |
| Rijbewijs       | Bent u in het bezit van een auto-rijbewijs (B of BE)?                                                                                                         | {Ja,Ja}<br>{Nee,Nee}                                                                                                                                                                                                                                                                                   |
| Rijervaring_Alg | Hoeveel jaar bent u in het bezit van een rijbewijs?                                                                                                           | {00-01,0 - 1 jaar}<br>{02-04,2 - 4 jaar}<br>{04-09,5 - 9 jaar}<br>{10-19,10 - 19 jaar}<br>{20-99,20 jaar of meer}                                                                                                                                                                                      |
| KM_per_jaar     | Hoeveel kilometer per jaar rijdt u in totaal (zakelijk én privé)? Om de inschatting gemakkelijker te maken, staat het aantal kilometers per week ook vermeld. | {00-10,Minder dan 10.000 km/jaar (190 km/week)}<br>{10-20,Tussen de 10.000 en 20.000 km/jaar (190 - 385 km/week)}<br>{20-30,Tussen de 20.000 en 30.000 km/jaar (385 - 575 km/week)}<br>{30-40,Tussen de 30.000 en 40.000 km/jaar (575 - 770 km/week)}<br>{40-99,Meer dan 40.000 km/jaar (770 km/week)} |
| Rijervaring_ACC | Hebt u ervaring met Adaptive Cruise Control? Ervaring betekent dat u een auto met ACC bezit of regelmatig (wekelijks of vaker) gebruikt.                      | {Ja,Ja}<br>{Nee,Nee}                                                                                                                                                                                                                                                                                   |
| Automerk        | Van welk automerk is deze auto met ACC?                                                                                                                       | {Audi,Audi}<br>{BMW,BMW}<br>{Citroen,Citroën}<br>{Ford,Ford}<br>{Mazda,Mazda}<br>{Mercedes,Mercedes Benz}<br>{Mitsubis,Mitsubishi}<br>{Opel,Opel}<br>{Peugeot,Peugeot}<br>{Seat,Seat}<br>{Skoda,Skoda}<br>{Suzuki,Suzuki}<br>{Volkswag,Volkswagen}<br>{Volvo,Volvo}<br>{Anders,Anders, namelijk: }     |
| Automerk_15     | Van welk automerk is deze auto met ACC? - Anders, namelijk: (Open)                                                                                            |                                                                                                                                                                                                                                                                                                        |
| Transmissie     | Heeft deze auto met ACC een automatische of een handgeschakelde versnellingsbak?                                                                              | {Automaat,Automatische versnellingsbak}<br>{Schakel,Handgeschakelde versnellingsbak}                                                                                                                                                                                                                   |
| Ondergrens      | Heeft dit ACC-systeem een ondergrens of blijft het actief bij lage snelheden?                                                                                 | {Ja,Het deactiveert onder een bepaalde snelheid (meestal rond de 50 km/u)}<br>{Nee,Het blijft actief totdat de auto stilstaat}<br>{Onbekend,Dat weet ik niet}                                                                                                                                          |
| Instelbaar_volg | Heeft dit ACC-systeem een instelbare volgafstand?                                                                                                             | {Ja,Ja, er zijn verschillende standen instelbaar}<br>{Nee,Nee, er is maar één stand mogelijk}<br>{Onbekend,Dat weet ik niet}                                                                                                                                                                           |

|                  |                                                                                                                                                                         |                                                                                                                                                                                                                                                              |
|------------------|-------------------------------------------------------------------------------------------------------------------------------------------------------------------------|--------------------------------------------------------------------------------------------------------------------------------------------------------------------------------------------------------------------------------------------------------------|
| Eigenaar         | Van wie is de auto met ACC die u gebruikt?                                                                                                                              | {Eigen,Het is mijn eigen auto}<br>{Lease,Het is een (lease)auto van het bedrijf}<br>{HuurDeel,Het is een huurauto/deelauto}<br>{Fam,Het is een auto van een familielid of kennis}<br>{Anders,Anders, namelijk:}                                              |
| Eigenaar_5       | Van wie is de auto met ACC die u gebruikt? - Anders, namelijk: (Open)                                                                                                   |                                                                                                                                                                                                                                                              |
| Zakelijk_Prive   | Hoe gebruikt u deze auto met ACC?                                                                                                                                       | {Prive,(Bijna) alleen privé}<br>{Zakelijk,(Bijna) alleen zakelijk}<br>{Beide,Privé en zakelijk}                                                                                                                                                              |
| Tijd_gebruik_ACC | Hoe lang hebt u rij-ervaring in deze auto met ACC?                                                                                                                      | {00-03,Minder dan 3 maanden}<br>{03-06,Tussen de 3 en de 6 maanden}<br>{06-12,Tussen de 6 maanden en 1 jaar}<br>{12-24,Tussen de 1 en 2 jaar}<br>{24-99,Meer dan 2 jaar}                                                                                     |
| km_per_week_AC   | Hoeveel kilometer per week rijdt u gemiddeld in deze auto met ACC?                                                                                                      | {000-200,Minder dan 200 km/week}<br>{200-400,Tussen de 200 en 400 km/week}<br>{400-600,Tussen de 400 en 600 km/week}<br>{600-800,Tussen de 600 en 800 km/week}<br>{800-999,Meer dan 800 km/week}                                                             |
| laatst_gebr_ACC  | Wanneer hebt u voor het laatst gebruik gemaakt van deze auto met ACC?                                                                                                   | {mndr_6mn,Minder dan een half jaar geleden}<br>{meer_6mn,Meer dan een half jaar geleden}                                                                                                                                                                     |
| Bewuste_keuze    | Heeft u bewust voor ACC gekozen?                                                                                                                                        | {Ja_ACC,Ja, ik heb bewust gekozen voor ACC}<br>{Ja_pakke,Ja, ik heb bewust gekozen voor een pakket waar ACC in zit}<br>{Nee_onbe,Nee, ik heb niet bewust gekozen voor ACC}<br>{Nee_ande,Nee, een ander heeft gekozen voor ACC}<br>{Anders,Anders, namelijk:} |
| Bewuste_keuze_5  | Heeft u bewust voor ACC gekozen? - Anders, namelijk: (Open)                                                                                                             |                                                                                                                                                                                                                                                              |
| Voorlichting     | Bent u voor het gebruik van deze auto met ACC voorgelicht over de werking ervan, bijvoorbeeld door een uitleg van de autodealer, of door het instructieboekje te lezen? | {Uitgebre,Ja, ik ben uitgebreid voorgelicht over ACC}<br>{Beetje,Ja, ik ben een klein beetje voorgelicht over ACC}<br>{Niet,Nee, ik ben niet voorgelicht over ACC}<br>{Onbekend,Dat weet ik niet meer}                                                       |
| Bewust_risicos   | Bent u zich bewust van de beperkingen en risico's van Adaptive Cruise Control?                                                                                          | {Uitgebre,Ja, ik ben me volledig bewust van de beperkingen en risico's}<br>{Beetje,Ja, ik weet ongeveer waar ik op moet letten}<br>{Nee,Nee, daar houd ik me niet of nauwelijks mee bezig}<br>{Anders,Anders, namelijk:}                                     |
| Bewust_risicos_4 | Bent u zich bewust van de beperkingen en risico's van Adaptive Cruise Control? - Anders, namelijk: (Open)                                                               |                                                                                                                                                                                                                                                              |
| Wegtype_A        | Geef voor elk wegtype aan of u ACC prettig vindt om te gebruiken. - Op wegen binnen de bebouwde kom                                                                     | {Z_onpret,Zeer onprettig}<br>{Onpretti,Onprettig}<br>{Neutraal,Neutraal}<br>{Prettig,Prettig}<br>{Z_pretti,Zeer prettig}                                                                                                                                     |



|                |                                                                                                                                                                                                                                                                                                   |                                                                                                                                                                                         |
|----------------|---------------------------------------------------------------------------------------------------------------------------------------------------------------------------------------------------------------------------------------------------------------------------------------------------|-----------------------------------------------------------------------------------------------------------------------------------------------------------------------------------------|
| Wegtype_B      | Geef voor elk wegtype aan of u ACC prettig vindt om te gebruiken. - Op provinciale wegen buiten de bebouwde kom                                                                                                                                                                                   | {Z_onpret,Zeer onprettig}<br>{Onpretti,Onprettig}<br>{Neutraal,Neutraal}<br>{Prettig,Prettig}<br>{Z_pretti,Zeer prettig}                                                                |
| Wegtype_C      | Geef voor elk wegtype aan of u ACC prettig vindt om te gebruiken. - Op autowegen                                                                                                                                                                                                                  | {Z_onpret,Zeer onprettig}<br>{Onpretti,Onprettig}<br>{Neutraal,Neutraal}<br>{Prettig,Prettig}<br>{Z_pretti,Zeer prettig}                                                                |
| Wegtype_D      | Geef voor elk wegtype aan of u ACC prettig vindt om te gebruiken. - Op autosnelwegen                                                                                                                                                                                                              | {Z_onpret,Zeer onprettig}<br>{Onpretti,Onprettig}<br>{Neutraal,Neutraal}<br>{Prettig,Prettig}<br>{Z_pretti,Zeer prettig}                                                                |
| Toe_Type_Weg   | Ruimte voor een eventuele toelichting:                                                                                                                                                                                                                                                            |                                                                                                                                                                                         |
| Dichtheden_A   | Deze vraag heeft betrekking op de snelweg . Geef voor elke mate van verkeersdrukte aan of u ACC fijn vindt om te gebruiken. - Weinig tot geen verkeer - geen interactie met andere voertuigen.                                                                                                    | {Z_onpret,Zeer onprettig}<br>{Onpretti,Onprettig}<br>{Neutraal,Neutraal}<br>{Prettig,Prettig}<br>{Z_pretti,Zeer prettig}                                                                |
| Dichtheden_B   | Deze vraag heeft betrekking op de snelweg . Geef voor elke mate van verkeersdrukte aan of u ACC fijn vindt om te gebruiken. - Gemiddelde verkeersdrukte - af en toe interactie met andere voertuigen.                                                                                             | {Z_onpret,Zeer onprettig}<br>{Onpretti,Onprettig}<br>{Neutraal,Neutraal}<br>{Prettig,Prettig}<br>{Z_pretti,Zeer prettig}                                                                |
| Dichtheden_C   | Deze vraag heeft betrekking op de snelweg . Geef voor elke mate van verkeersdrukte aan of u ACC fijn vindt om te gebruiken. - Veel verkeer - (bijna) continu interactie met andere voertuigen.                                                                                                    | {Z_onpret,Zeer onprettig}<br>{Onpretti,Onprettig}<br>{Neutraal,Neutraal}<br>{Prettig,Prettig}<br>{Z_pretti,Zeer prettig}                                                                |
| Dichtheden_D   | Deze vraag heeft betrekking op de snelweg . Geef voor elke mate van verkeersdrukte aan of u ACC fijn vindt om te gebruiken. - Grote verkeersdrukte - langzaamrijdend verkeer of file.                                                                                                             | {Z_onpret,Zeer onprettig}<br>{Onpretti,Onprettig}<br>{Neutraal,Neutraal}<br>{Prettig,Prettig}<br>{Z_pretti,Zeer prettig}                                                                |
| Toe_Dichtheden | Ruimte voor een eventuele toelichting:                                                                                                                                                                                                                                                            |                                                                                                                                                                                         |
| Rijtaak_A      | De volgende stellingen gaan over uw rijtaak wanneer u ACC aan heeft, vergeleken met wanneer u ACC niet aan heeft. Kunt u bij elke stelling aangeven in hoeverre u het er mee eens bent? - Als ik ACC aan heb, kost het autorijden me minder inspanning                                            | {Z_oneens,Zeer mee oneens}<br>{Oneens,Mee oneens}<br>{E_oneens,Enigszins mee oneens}<br>{Neutraal,Neutraal}<br>{E_eens,Enigszins mee eens}<br>{Eens,Mee eens}<br>{Z_eens,Zeer mee eens} |
| Rijtaak_B      | De volgende stellingen gaan over uw rijtaak wanneer u ACC aan heeft, vergeleken met wanneer u ACC niet aan heeft. Kunt u bij elke stelling aangeven in hoeverre u het er mee eens bent? - Als ik ACC aan heb, hoef ik minder op het verkeer te letten                                             | {Z_oneens,Zeer mee oneens}<br>{Oneens,Mee oneens}<br>{E_oneens,Enigszins mee oneens}<br>{Neutraal,Neutraal}<br>{E_eens,Enigszins mee eens}<br>{Eens,Mee eens}<br>{Z_eens,Zeer mee eens} |
| Rijtaak_C      | De volgende stellingen gaan over uw rijtaak wanneer u ACC aan heeft, vergeleken met wanneer u ACC niet aan heeft. Kunt u bij elke stelling aangeven in hoeverre u het er mee eens bent? - Als ik ACC aan heb, doe ik meer activiteiten tijdens het autorijden (bellen, smartphone gebruiken, ...) | {Z_oneens,Zeer mee oneens}<br>{Oneens,Mee oneens}<br>{E_oneens,Enigszins mee oneens}<br>{Neutraal,Neutraal}<br>{E_eens,Enigszins mee eens}<br>{Eens,Mee eens}<br>{Z_eens,Zeer mee eens} |
| Toe_Rijtaak    | Ruimte voor een eventuele toelichting:                                                                                                                                                                                                                                                            |                                                                                                                                                                                         |
| Veiligheid_A   | De volgende stellingen gaan over de veiligheid wanneer u ACC aan heeft, vergeleken met wanneer u ACC niet aan heeft. Kunt u bij elke stelling aangeven in hoeverre u het er mee eens bent? - Als ik ACC aan heb, loop ik minder risico op een kop-staart-botsing                                  | {Z_oneens,Zeer mee oneens}<br>{Oneens,Mee oneens}<br>{E_oneens,Enigszins mee oneens}<br>{Neutraal,Neutraal}<br>{E_eens,Enigszins mee eens}<br>{Eens,Mee eens}<br>{Z_eens,Zeer mee eens} |

|                 |                                                                                                                                                                                                                                                                                                           |                                                                                                                                                                                             |
|-----------------|-----------------------------------------------------------------------------------------------------------------------------------------------------------------------------------------------------------------------------------------------------------------------------------------------------------|---------------------------------------------------------------------------------------------------------------------------------------------------------------------------------------------|
| Veiligheid_B    | De volgende stellingen gaan over de veiligheid wanneer u ACC aan heeft, vergeleken met wanneer u ACC niet aan heeft. Kunt u bij elke stelling aangeven in hoeverre u het er mee eens bent? - Als ik ACC aan heb, kom ik minder vaak in onveilige situaties terecht                                        | {Z_ oneens,Zeer mee oneens}<br>{Oneens,Mee oneens}<br>{E_ oneens,Enigszins mee oneens}<br>{Neutraal,Neutraal}<br>{E_ eens,Enigszins mee eens}<br>{Eens,Mee eens}<br>{Z_ eens,Zeer mee eens} |
| Veiligheid_C    | De volgende stellingen gaan over de veiligheid wanneer u ACC aan heeft, vergeleken met wanneer u ACC niet aan heeft. Kunt u bij elke stelling aangeven in hoeverre u het er mee eens bent? - Als ik ACC aan heb, rijd ik minder vaak sneller dan de maximumsnelheid                                       | {Z_ oneens,Zeer mee oneens}<br>{Oneens,Mee oneens}<br>{E_ oneens,Enigszins mee oneens}<br>{Neutraal,Neutraal}<br>{E_ eens,Enigszins mee eens}<br>{Eens,Mee eens}<br>{Z_ eens,Zeer mee eens} |
| Veiligheid_D    | De volgende stellingen gaan over de veiligheid wanneer u ACC aan heeft, vergeleken met wanneer u ACC niet aan heeft. Kunt u bij elke stelling aangeven in hoeverre u het er mee eens bent? - Als ik ACC aan heb, heb ik meer tijd nodig om in te grijpen door te remmen of bij te sturen als dat nodig is | {Z_ oneens,Zeer mee oneens}<br>{Oneens,Mee oneens}<br>{E_ oneens,Enigszins mee oneens}<br>{Neutraal,Neutraal}<br>{E_ eens,Enigszins mee eens}<br>{Eens,Mee eens}<br>{Z_ eens,Zeer mee eens} |
| Veiligheid_E    | De volgende stellingen gaan over de veiligheid wanneer u ACC aan heeft, vergeleken met wanneer u ACC niet aan heeft. Kunt u bij elke stelling aangeven in hoeverre u het er mee eens bent? - Ik zou liever hebben dat ACC alleen een melding en/of geluidssignaal gaf, in plaats van actief in te grijpen | {Z_ oneens,Zeer mee oneens}<br>{Oneens,Mee oneens}<br>{E_ oneens,Enigszins mee oneens}<br>{Neutraal,Neutraal}<br>{E_ eens,Enigszins mee eens}<br>{Eens,Mee eens}<br>{Z_ eens,Zeer mee eens} |
| Toe_Veiligheid  | Ruimte voor een eventuele toelichting:                                                                                                                                                                                                                                                                    |                                                                                                                                                                                             |
| Situaties_ACC_A | Geef aan hoe vaak de volgende situaties voorkomen als u ACC aan heeft staan. - U geeft gas bij om de afstand tot uw voorganger kleiner te maken omdat de ACC een te grote afstand aanhoudt                                                                                                                | {Nooit,Helemaal nooit}<br>{Bijna_no,Bijna nooit}<br>{Af_en_to,Af en toe}<br>{Regelmat,Regelmatig}<br>{Vaak,Vaak}<br>{Bijna_al,Bijna altijd}<br>{Altijd,Altijd}                              |
| Situaties_ACC_B | Geef aan hoe vaak de volgende situaties voorkomen als u ACC aan heeft staan. - Een auto voegt in tussen u en uw voorganger, en uw auto reageert door fors te remmen                                                                                                                                       | {Nooit,Helemaal nooit}<br>{Bijna_no,Bijna nooit}<br>{Af_en_to,Af en toe}<br>{Regelmat,Regelmatig}<br>{Vaak,Vaak}<br>{Bijna_al,Bijna altijd}<br>{Altijd,Altijd}                              |
| Situaties_ACC_C | Geef aan hoe vaak de volgende situaties voorkomen als u ACC aan heeft staan. - U geeft gas bij om een andere auto in te halen, omdat uw auto anders afremt voor die auto                                                                                                                                  | {Nooit,Helemaal nooit}<br>{Bijna_no,Bijna nooit}<br>{Af_en_to,Af en toe}<br>{Regelmat,Regelmatig}<br>{Vaak,Vaak}<br>{Bijna_al,Bijna altijd}<br>{Altijd,Altijd}                              |
| Situaties_ACC_D | Geef aan hoe vaak de volgende situaties voorkomen als u ACC aan heeft staan. - In een scherpe bocht verliest de ACC van uw auto zicht op uw voorganger, en dus versnelt uw auto onverwacht                                                                                                                | {Nooit,Helemaal nooit}<br>{Bijna_no,Bijna nooit}<br>{Af_en_to,Af en toe}<br>{Regelmat,Regelmatig}<br>{Vaak,Vaak}<br>{Bijna_al,Bijna altijd}<br>{Altijd,Altijd}                              |
| Situaties_ACC_E | Geef aan hoe vaak de volgende situaties voorkomen als u ACC aan heeft staan. - ACC schakelt plotseling uit terwijl u het niet verwacht                                                                                                                                                                    | {Nooit,Helemaal nooit}<br>{Bijna_no,Bijna nooit}<br>{Af_en_to,Af en toe}<br>{Regelmat,Regelmatig}<br>{Vaak,Vaak}<br>{Bijna_al,Bijna altijd}<br>{Altijd,Altijd}                              |
| Situaties_ACC_F | Geef aan hoe vaak de volgende situaties voorkomen als u ACC aan heeft staan. - ACC remt of versnelt plotseling terwijl u dat niet verwacht                                                                                                                                                                | {Nooit,Helemaal nooit}<br>{Bijna_no,Bijna nooit}<br>{Af_en_to,Af en toe}<br>{Regelmat,Regelmatig}<br>{Vaak,Vaak}<br>{Bijna_al,Bijna altijd}<br>{Altijd,Altijd}                              |

|                    |                                                                                                                                                                                                                                                                                               |                                                                                                                                                                                                                     |
|--------------------|-----------------------------------------------------------------------------------------------------------------------------------------------------------------------------------------------------------------------------------------------------------------------------------------------|---------------------------------------------------------------------------------------------------------------------------------------------------------------------------------------------------------------------|
| Toe_situaties_AC   | Zijn er andere situaties die u meemaakt of meegemaakt heeft tijdens het gebruik van ACC die u als onveilig of onprettig ervaart? Vermeld bij de situatie ook hoe vaak het voorkomt.                                                                                                           |                                                                                                                                                                                                                     |
| Doorstroming_A     | De volgende stellingen gaan over de doorstroming wanneer u ACC aan heeft, vergeleken met wanneer u ACC niet aan heeft. Kunt u bij elke stelling aangeven in hoeverre u het er mee eens bent? - Als ik ACC aan heb, rijd ik gelijkmatiger (dus ik hoef minder vaak te remmen en op te trekken) | {Z_ oneens,Zeer mee oneens}<br>{Oneens,Mee oneens}<br>{E_eens,Enigszins mee eens}<br>{Neutraal,Neutraal}<br>{E_ oneens,Enigszins mee oneens}<br>{Eens,Mee eens}<br>{Z_eens,Zeer mee eens}                           |
| Doorstroming_B     | De volgende stellingen gaan over de doorstroming wanneer u ACC aan heeft, vergeleken met wanneer u ACC niet aan heeft. Kunt u bij elke stelling aangeven in hoeverre u het er mee eens bent? - Als ik ACC aan heb, houd ik meer afstand tot mijn voorganger                                   | {Z_ oneens,Zeer mee oneens}<br>{Oneens,Mee oneens}<br>{E_eens,Enigszins mee eens}<br>{Neutraal,Neutraal}<br>{E_ oneens,Enigszins mee oneens}<br>{Eens,Mee eens}<br>{Z_eens,Zeer mee eens}                           |
| Doorstroming_C     | De volgende stellingen gaan over de doorstroming wanneer u ACC aan heeft, vergeleken met wanneer u ACC niet aan heeft. Kunt u bij elke stelling aangeven in hoeverre u het er mee eens bent? - Als ik ACC aan heb, wissel ik minder vaak van rijstrook op de snelweg                          | {Z_ oneens,Zeer mee oneens}<br>{Oneens,Mee oneens}<br>{E_eens,Enigszins mee eens}<br>{Neutraal,Neutraal}<br>{E_ oneens,Enigszins mee oneens}<br>{Eens,Mee eens}<br>{Z_eens,Zeer mee eens}                           |
| Doorstroming_D     | De volgende stellingen gaan over de doorstroming wanneer u ACC aan heeft, vergeleken met wanneer u ACC niet aan heeft. Kunt u bij elke stelling aangeven in hoeverre u het er mee eens bent? - Als ik ACC aan heb, rijd ik meer op de rechterrijstrook op de snelweg                          | {Z_ oneens,Zeer mee oneens}<br>{Oneens,Mee oneens}<br>{E_eens,Enigszins mee eens}<br>{Neutraal,Neutraal}<br>{E_ oneens,Enigszins mee oneens}<br>{Eens,Mee eens}<br>{Z_eens,Zeer mee eens}                           |
| Toe_Doorstroming   | Ruimte voor een eventuele toelichting:                                                                                                                                                                                                                                                        |                                                                                                                                                                                                                     |
| Cijfer_ACC         | Kunt u met behulp van de schuifbalk een rapportcijfer geven aan het ACC-systeem waar u ervaring mee heeft? (1 is buitengewoon negatief - 10 is buitengewoon positief)                                                                                                                         | {1.00,1}<br>{1.5,1.5}<br>{2,2}<br>{2.5,2.5}<br>{3,3}<br>{3.5,3.5}<br>{4,4}<br>{4.5,4.5}<br>{5,5}<br>{5.5,5.5}<br>{6,6}<br>{6.5,6.5}<br>{7,7}<br>{7.5,7.5}<br>{8,8}<br>{8.5,8.5}<br>{9,9}<br>{9.5,9.5}<br>{10.00,10} |
| Toe_Cijfer_ACC     | Kunt u toelichten waarom u dit cijfer gegeven heeft?                                                                                                                                                                                                                                          |                                                                                                                                                                                                                     |
| Aanbevelen         | Geef aan of u het eens bent met de volgende stelling: Ik zou Adaptive Cruise Control aanbevelen aan een ander.                                                                                                                                                                                | {Z_eens,Zeer mee eens}<br>{Eens,Mee eens}<br>{Neutraal,Neutraal}<br>{Oneens,mee oneens}<br>{Z_Oneens,Zeer mee oneens}<br>{Onbekend,Dat weet ik niet}                                                                |
| Opmerkingen        | Hebt verder nog andere ervaringen, opmerkingen of tips over de vormgeving en het gebruik van Adaptive Cruise Control?                                                                                                                                                                         |                                                                                                                                                                                                                     |
| Rijstijl_Kernwoo_A | Hoe typeert u uw eigen rijstijl? Geef voor elke twee trefwoorden aan in hoeverre ze op uw rijstijl van toepassing zijn. - Langzaam                                                                                                                                                            | {LZ_Sterk,}<br>{LSterk,}<br>{LMatig,}<br>{Neutraal,}<br>{RMatig,}<br>{RSterk,}<br>{RZ_Sterk,}                                                                                                                       |

|                    |                                                                                                                                                                                |                                                                                                                                                                |
|--------------------|--------------------------------------------------------------------------------------------------------------------------------------------------------------------------------|----------------------------------------------------------------------------------------------------------------------------------------------------------------|
| Rijstijl_Kernwoo_B | Hoe typeert u uw eigen rijstijl? Geef voor elke twee trefwoorden aan in hoeverre ze op uw rijstijl van toepassing zijn. - Zorgvuldig                                           | {LZ_Sterk,}<br>{LSterk,}<br>{LMatig,}<br>{Neutraal,}<br>{RMatig,}<br>{RSterk,}<br>{RZ_Sterk,}                                                                  |
| Rijstijl_Kernwoo_C | Hoe typeert u uw eigen rijstijl? Geef voor elke twee trefwoorden aan in hoeverre ze op uw rijstijl van toepassing zijn. - Tolerant                                             | {LZ_Sterk,}<br>{LSterk,}<br>{LMatig,}<br>{Neutraal,}<br>{RMatig,}<br>{RSterk,}<br>{RZ_Sterk,}                                                                  |
| Rijstijl_Kernwoo_D | Hoe typeert u uw eigen rijstijl? Geef voor elke twee trefwoorden aan in hoeverre ze op uw rijstijl van toepassing zijn. - Besluiteloos                                         | {LZ_Sterk,}<br>{LSterk,}<br>{LMatig,}<br>{Neutraal,}<br>{RMatig,}<br>{RSterk,}<br>{RZ_Sterk,}                                                                  |
| Rijstijl_Overtre_A | Geef aan hoe vaak u de volgende handelingen in het verkeer uitvoert. - Op de snelweg zo dicht op uw voorganger rijden dat het moeilijk is om in een noodgeval veilig te remmen | {Nooit,Helemaal nooit}<br>{Bijna_no,Bijna nooit}<br>{Af_en_to,Af en toe}<br>{Regelmat,Regelmatig}<br>{Vaak,Vaak}<br>{Bijna_al,Bijna altijd}<br>{Altijd,Altijd} |
| Rijstijl_Overtre_B | Geef aan hoe vaak u de volgende handelingen in het verkeer uitvoert. - Op de snelweg harder rijden dan de maximum-snelheid                                                     | {Nooit,Helemaal nooit}<br>{Bijna_no,Bijna nooit}<br>{Af_en_to,Af en toe}<br>{Regelmat,Regelmatig}<br>{Vaak,Vaak}<br>{Bijna_al,Bijna altijd}<br>{Altijd,Altijd} |
| Rijstijl_Overtre_C | Geef aan hoe vaak u de volgende handelingen in het verkeer uitvoert. - Een boete voor een verkeersovertreding ontvangen                                                        | {Nooit,Helemaal nooit}<br>{Bijna_no,Bijna nooit}<br>{Af_en_to,Af en toe}<br>{Regelmat,Regelmatig}<br>{Vaak,Vaak}<br>{Bijna_al,Bijna altijd}<br>{Altijd,Altijd} |
| Rijstijl_Overtre_D | Geef aan hoe vaak u de volgende handelingen in het verkeer uitvoert. - Uzelf ergeren aan medeweggebruikers                                                                     | {Nooit,Helemaal nooit}<br>{Bijna_no,Bijna nooit}<br>{Af_en_to,Af en toe}<br>{Regelmat,Regelmatig}<br>{Vaak,Vaak}<br>{Bijna_al,Bijna altijd}<br>{Altijd,Altijd} |
| Rijstijl_Overtre_E | Geef aan hoe vaak u de volgende handelingen in het verkeer uitvoert. - Andere activiteiten uitvoeren achter het stuur, zoals bellen, uw smartphone bedienen of roken           | {Nooit,Helemaal nooit}<br>{Bijna_no,Bijna nooit}<br>{Af_en_to,Af en toe}<br>{Regelmat,Regelmatig}<br>{Vaak,Vaak}<br>{Bijna_al,Bijna altijd}<br>{Altijd,Altijd} |
| Mailadres          | Wilt u kans maken op één van de vier VVV-bonnen, vult u dan hier uw e-mailadres in. Er wordt vóór 1 juli 2015 met u contact opgenomen als u gewonnen heeft.                    |                                                                                                                                                                |
| nqid               | Personals: Identification number                                                                                                                                               |                                                                                                                                                                |
| nqlastn            | Personals: Last name                                                                                                                                                           |                                                                                                                                                                |
| nqfirstn           | Personals: First name                                                                                                                                                          |                                                                                                                                                                |
| nqinit             | Personals: Initials                                                                                                                                                            |                                                                                                                                                                |
| nqinsert           | Personals: Title                                                                                                                                                               |                                                                                                                                                                |
| nqgender           | Personals: Gender                                                                                                                                                              | {M,Male}<br>{F,Female}<br>{X,Unknown}                                                                                                                          |
| nqemail            | Personals: Email address                                                                                                                                                       |                                                                                                                                                                |
| nqtel1             | Personals: Telephone 1                                                                                                                                                         |                                                                                                                                                                |

|              |                           |                   |
|--------------|---------------------------|-------------------|
| nqtel2       | Personals: Telephone 2    |                   |
| nqlang       | Personals: Language       |                   |
| nqusern      | Personals: Username       |                   |
| nqpwd        | Personals: Password       |                   |
| nqstart      | Personals: Started        | {1,Yes}<br>{0,No} |
| nqcompl      | Personals: Completed      | {1,Yes}<br>{0,No} |
| nqsess       | Personals: Sessions       |                   |
| nqdurat      | Personals: Time taken     |                   |
| nqdatsta     | Personals: Date started   |                   |
| nqdatcom     | Personals: Date completed |                   |
| nqdatcre     | Personals: Date created   |                   |
| nqipaddr     | Personals: IP address     |                   |
| respondentid |                           |                   |
| credits      |                           |                   |
| nqcredit     |                           |                   |
| browseragent |                           |                   |
